# Supplementary material
Source: PubMed Central journal article supplement (PMC5030063)

Table S1 Glycans imprinted on the microarray

| Glycan No. | Structure                                                                           |
|------------|-------------------------------------------------------------------------------------|
| 1          |    |
| 2          |    |
| 3          |    |
| 4          |    |
| 5          |    |
| 6          |    |
| 7          |  |
| 8          |  |
| 9          |  |
| 10         |  |
| 11         |  |
| 12         |  |

13

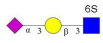

14

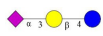

15

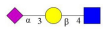

16

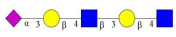

17

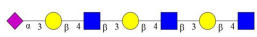

18

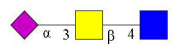

19

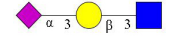

20

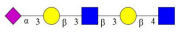

21

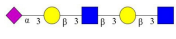

22

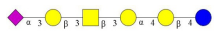

23

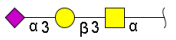

24

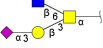

25

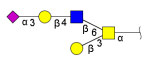

|    |  |
|----|--|
| 26 |  |
| 27 |  |
| 28 |  |
| 29 |  |
| 30 |  |
| 31 |  |
| 32 |  |
| 33 |  |
| 34 |  |
| 35 |  |
| 36 |  |
| 37 |  |
| 38 |  |

|    |  |
|----|--|
| 39 |  |
| 40 |  |
| 41 |  |
| 42 |  |
| 43 |  |
| 44 |  |
| 45 |  |
| 46 |  |
| 47 |  |
| 48 |  |
| 49 |  |
| 50 |  |
| 51 |  |

|    |  |
|----|--|
| 52 |  |
| 53 |  |

Supplement: NIHMS817054-supplement-table_S1.pdf [file NIHMS817054-supplement-table_S1.pdf]
